# Supplementary material for: Nonalcoholic fatty liver disease with cirrhosis increases familial risk for advanced fibrosis
Source: JCI journal article supplement (doi:10.1172/jci93465), 2017-06-18
Supplement: sd1 [file 1]

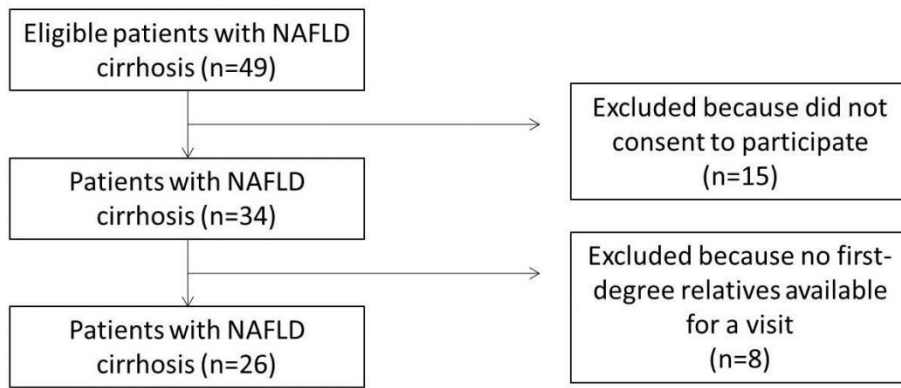

**Supplementary Figure 1** Derivation of study cohort

49 patients with NAFLD-cirrhosis were eligible to participate in the study, 15 patients did not consent to participate, 8 were excluded because there were no data available of their first-degree relatives. A total of 26 probands with NAFLD-cirrhosis were included.

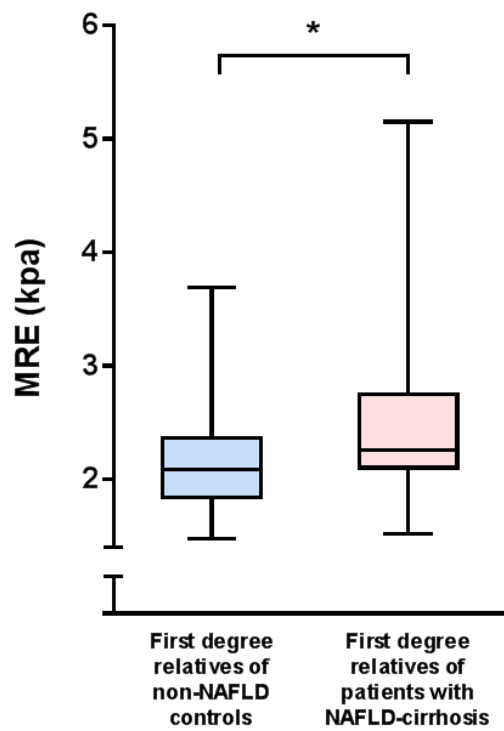

**Supplementary Figure 2.** MRE measurements distribution among first-degree relatives of NAFLD-cirrhosis (n=39) and first-degree relatives of controls (n=69).

\*p-value  $p < 0.003$

### **Supplemental acknowledgment**

The authors would like to thank the members of the Familial NAFLD Cirrhosis Research Consortium:

**NAFLD Research Center, Department of Medicine, University of California at San Diego, La Jolla, CA, USA :** Lisa Richards, Emily Rizo, Phirum Nguyen, Carolyn Hernandez, Lynda Fortney, Shirin Bassirian, Seema Singh, Sandra Cepin, Juan Gurrola, Madina Popal, Meera Soni, Amy Liu, Charlie C Park, Nikhil Sinha,

**J Craig Venter Institute, La Jolla, CA, USA:** John Craig Venter, Nicholas Schork

**Human Longevity Inc., San Diego, CA, USA:** Karen E. Nelson

**Departments of Medicine and Pharmacology, University of California, San Diego, USA:** Mohit Jain

**Division of Gastroenterology and, University of California-San Francisco, San Francisco, CA, USA:** Veeral Ajmera
